# Supplementary material for: Morphological profiling of tubercle bacilli identifies drug pathways of action
Source: PubMed Central journal article supplement (PMC7414088; doi:10.1073/pnas.2002738117), 2020-07-17
Supplement: pnas.2002738117.sapp.pdf [file pnas.2002738117.sapp.pdf]

1

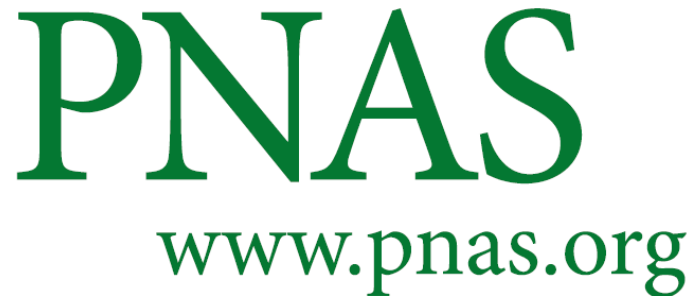

2

3 Supplementary Information for

4

5 Morphological profiling of tubercle bacilli identifies drug pathways of action

6

7 **Authors:** Trever C. Smith II<sup>1,2†</sup>, Krista M. Pullen<sup>1,3†</sup>, Michaela C. Olson<sup>1</sup>, Morgan E. McNellis<sup>1</sup>, Ian  
8 Richardson<sup>1,4</sup>, Sophia Hu<sup>5</sup>, Jonah Larkins-Ford<sup>1,6,7</sup>, Xin Wang<sup>8</sup>, Joel S. Freundlich<sup>8,9</sup>, D. Michael  
9 Ando<sup>10</sup>, and Bree B. Aldridge<sup>1,2,6,7,11\*</sup>

10

11 Correspondence to:

12 Bree B. Aldridge

13 Email: [bree.aldridge@tufts.edu](mailto:bree.aldridge@tufts.edu)

14

15

16 **This PDF file includes:**

17

18 Figures S1 to S10

19 Tables S1 to S2

20 Captions for movies S1 to S3

21 Captions for datasets S1 and S2

22

23 **Other supplementary materials for this manuscript include the following:**

24 Movies S1 to S3

25 Still images for movies S1 to S3

26 Datasets S1 and S2

1

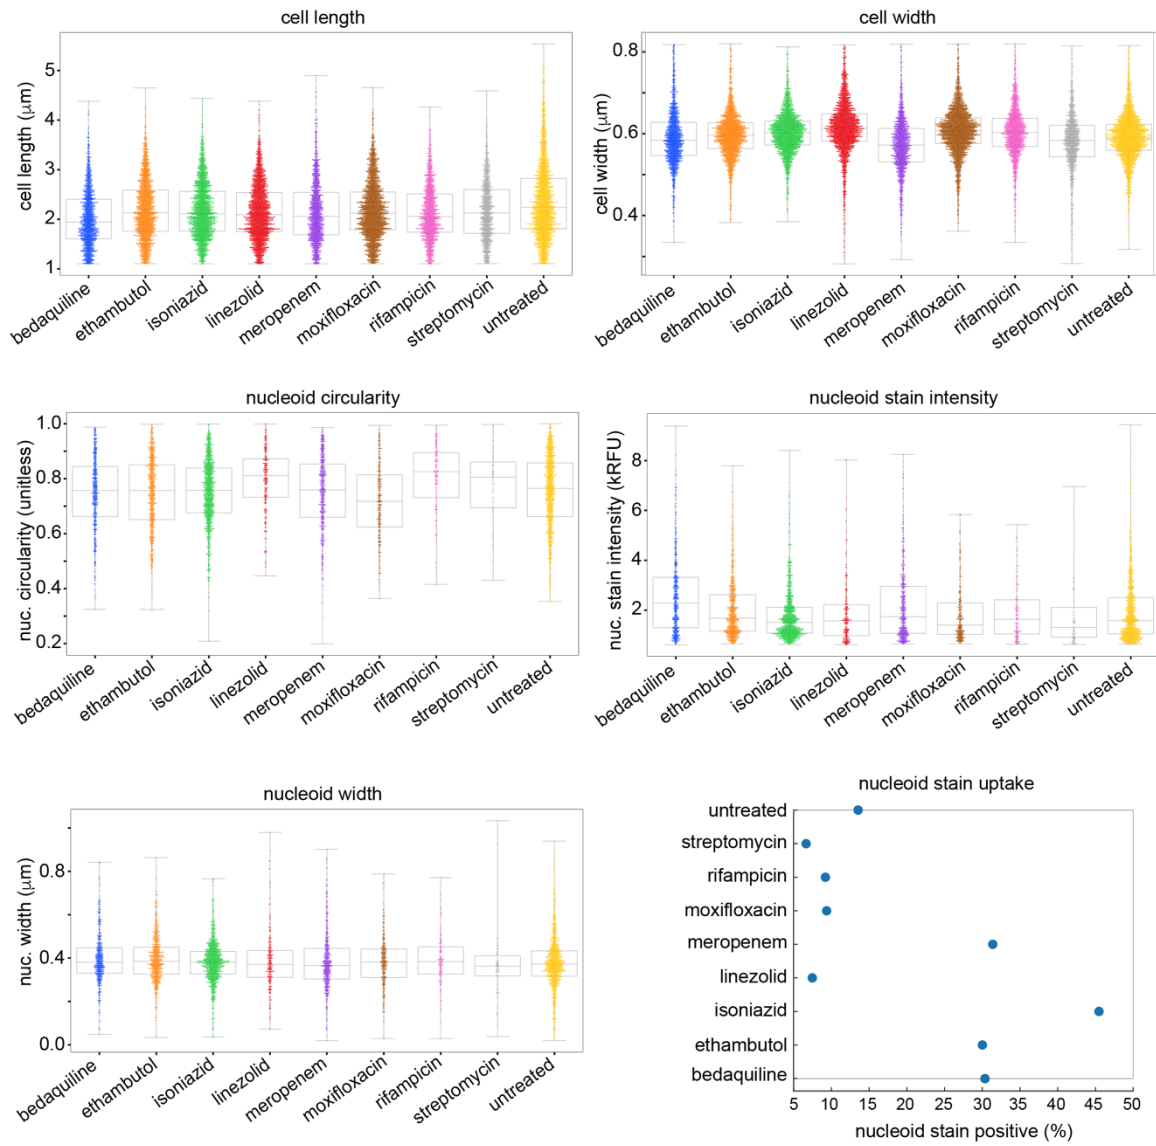

27

28 **Figure S1. Innate cell-to-cell heterogeneity in *Mtb* morphologies.** Dot and box plots of *Mtb*  
 29 morphological features in untreated (yellow) and drug-treated bacilli. Many bacilli are not stained  
 30 with SYTO 24, therefore only non-zero values are shown for nucleoid features. Cellular  
 31 heterogeneity is apparent among the most basic cytological features, including cell length, intensity  
 32 of nucleoid staining, and nucleoid width, even in untreated *Mtb* (CV=0.31, 0.64, 0.32,

33 respectively). All plots were generated using the statistical data visualization library Seaborn for  
34 Python™.  
35

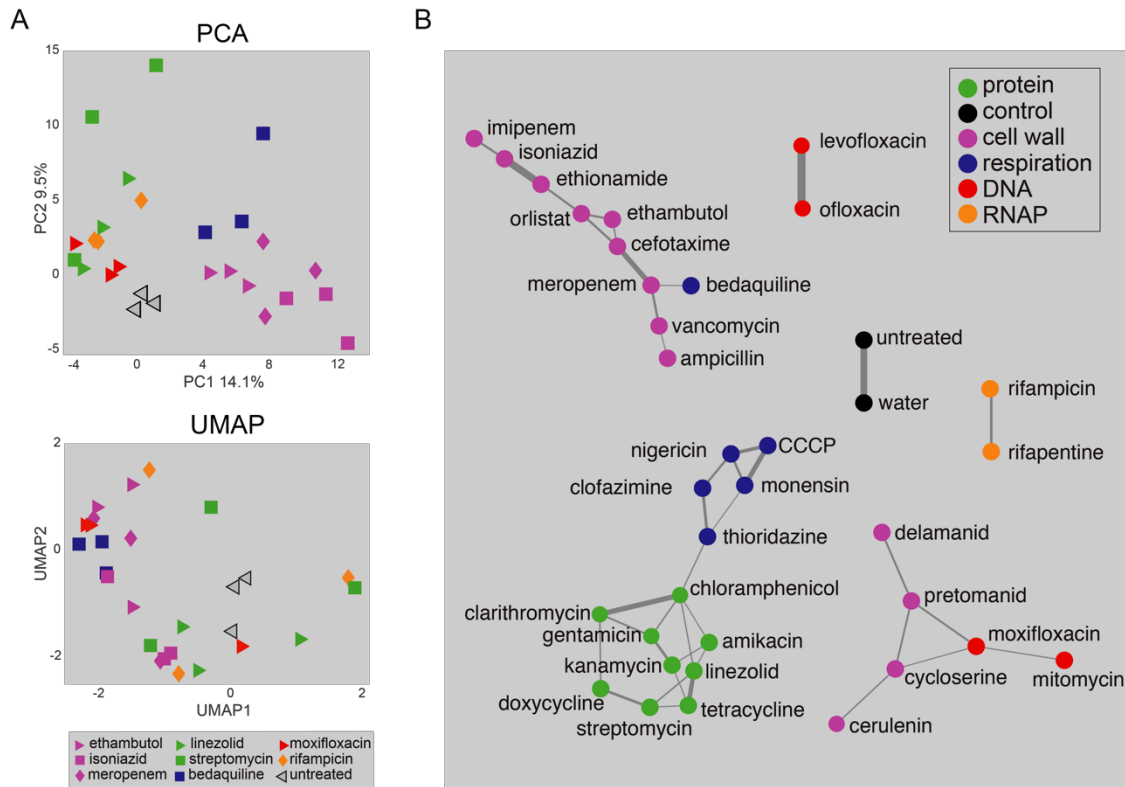

37

38 **Figure S2. Inherent heterogeneity of Mtb and subtle morphological features**  
 39 **requires multistep, multivariable analysis to define cytological profiles.** (A) PCA (top) and  
 40 UMAP (bottom) analyses of eight drug treatments at high dose after incorporating metrics of  
 41 heterogeneity [quartile 1, quartile 3, and interquartile range (IQR)], feature selection, and batch  
 42 normalization (TVN; bottom). n=3032-9651 for each treatment group over biological triplicate. TVN  
 43 aligns the covariance matrices resulting from PCA and whitening of untreated control data from  
 44 each batch and applies this transformation batch-by-batch to enable comparison across plates and  
 45 replicates. (B) cKNN connectivity map for high dose drug treatment of Mtb. Drug nodes are colored  
 46 by broad target category and edge thickness corresponds to how frequently profiles are nearest  
 47 neighbors in the classification trials (connections are shown for links >12%).

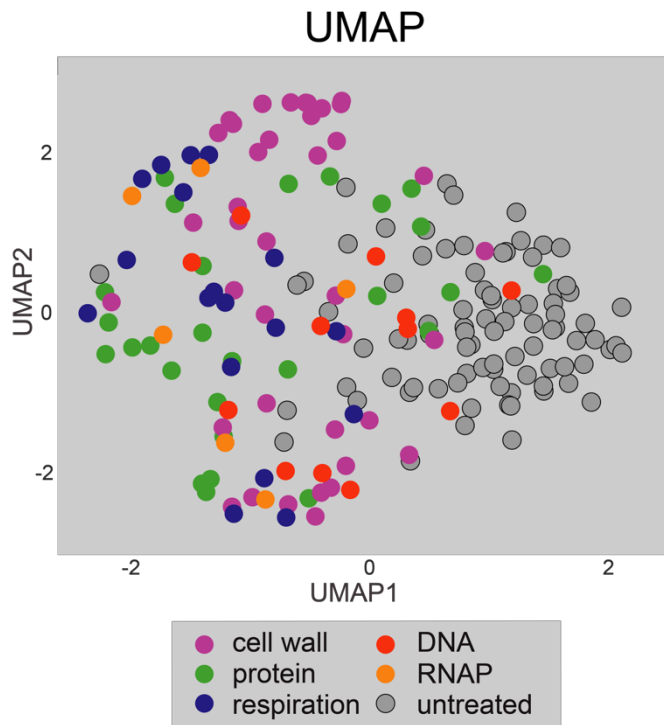

49 **Figure S3. UMAP analysis of 34 drug treated Mtb profiles.** Mtb drug profiles from 34 different  
 50 antibacterials at 3X IC90 (Table S1) after expansion of quantified features (Q1, IQR, Q3) and post  
 51 TVN. Data points represent individual biological replicates of a drug treatment and are color-coded  
 52 based on the broad cellular target as determined by literature review (Table S1).

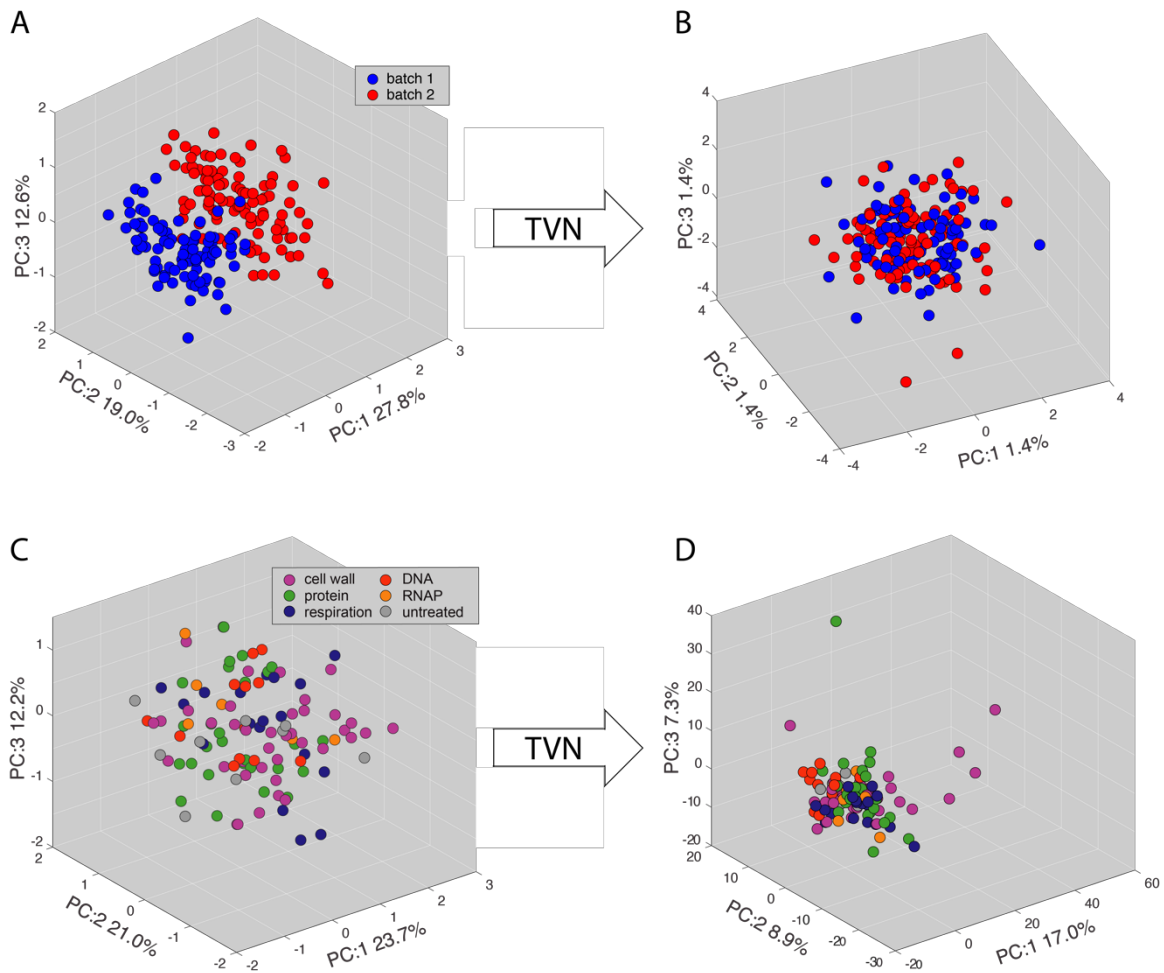

53

54 **Figure S4. Correction of batch-to-batch heterogeneity.** (PCA) of untreated data labeled by  
 55 batch. (A) PCA prior to TVN normalization. (B) PCA after TVN normalization. PCA of all 34 drug  
 56 treatments labeled by target pathway using all 94 features. (C) PCA prior to TVN normalization. (D)  
 57 PCA after TVN normalization. No feature selection was applied.

58

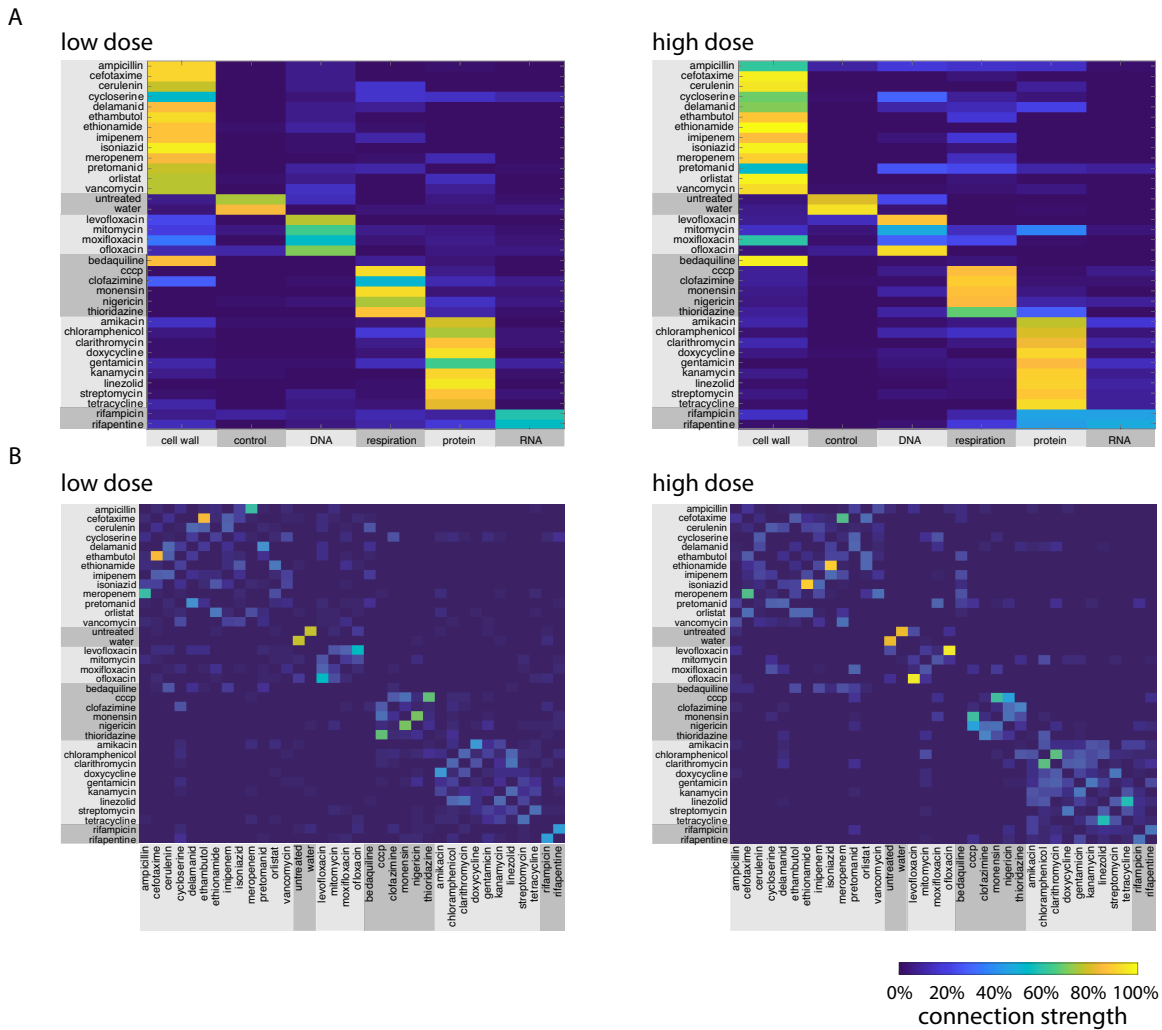

59

60 **Figure S5. Categorization of drug profiles using MorphEUS.** (A) Broad categorization for low  
 61 dose (left) and high dose (right) profiles are represented as heatmaps. The connection strength is  
 62 determined by the strength of the consensus k-nearest neighbor analysis. 100% strength indicates  
 63 that the nearest neighbor identified in every iteration was from the same target category while 0%  
 64 indicates that the drug of interest was never a neighbor to a drug in that pathway. Drugs are listed  
 65 in the rows and collection of drugs within the broad target pathways are listed in the columns. (B)  
 66 Heatmaps of drug nearest neighbor pairings for low dose (left) and high dose (right) treatment. The  
 67 heatmaps are described in Fig. 3. The high dose profiles were 91% accurate for assignment of  
 68 broad drug category (compared to 26% for randomized categorization) with 68% accurate cross

69 validation. The low dose profiles were 97% accurate for assignment of broad drug category with  
70 62% accurate cross validation. Pairwise drug connection strength values can be found in Dataset  
71 S1 for low (Sheet 2) and high (Sheet 3) dose profiles.  
72  
73



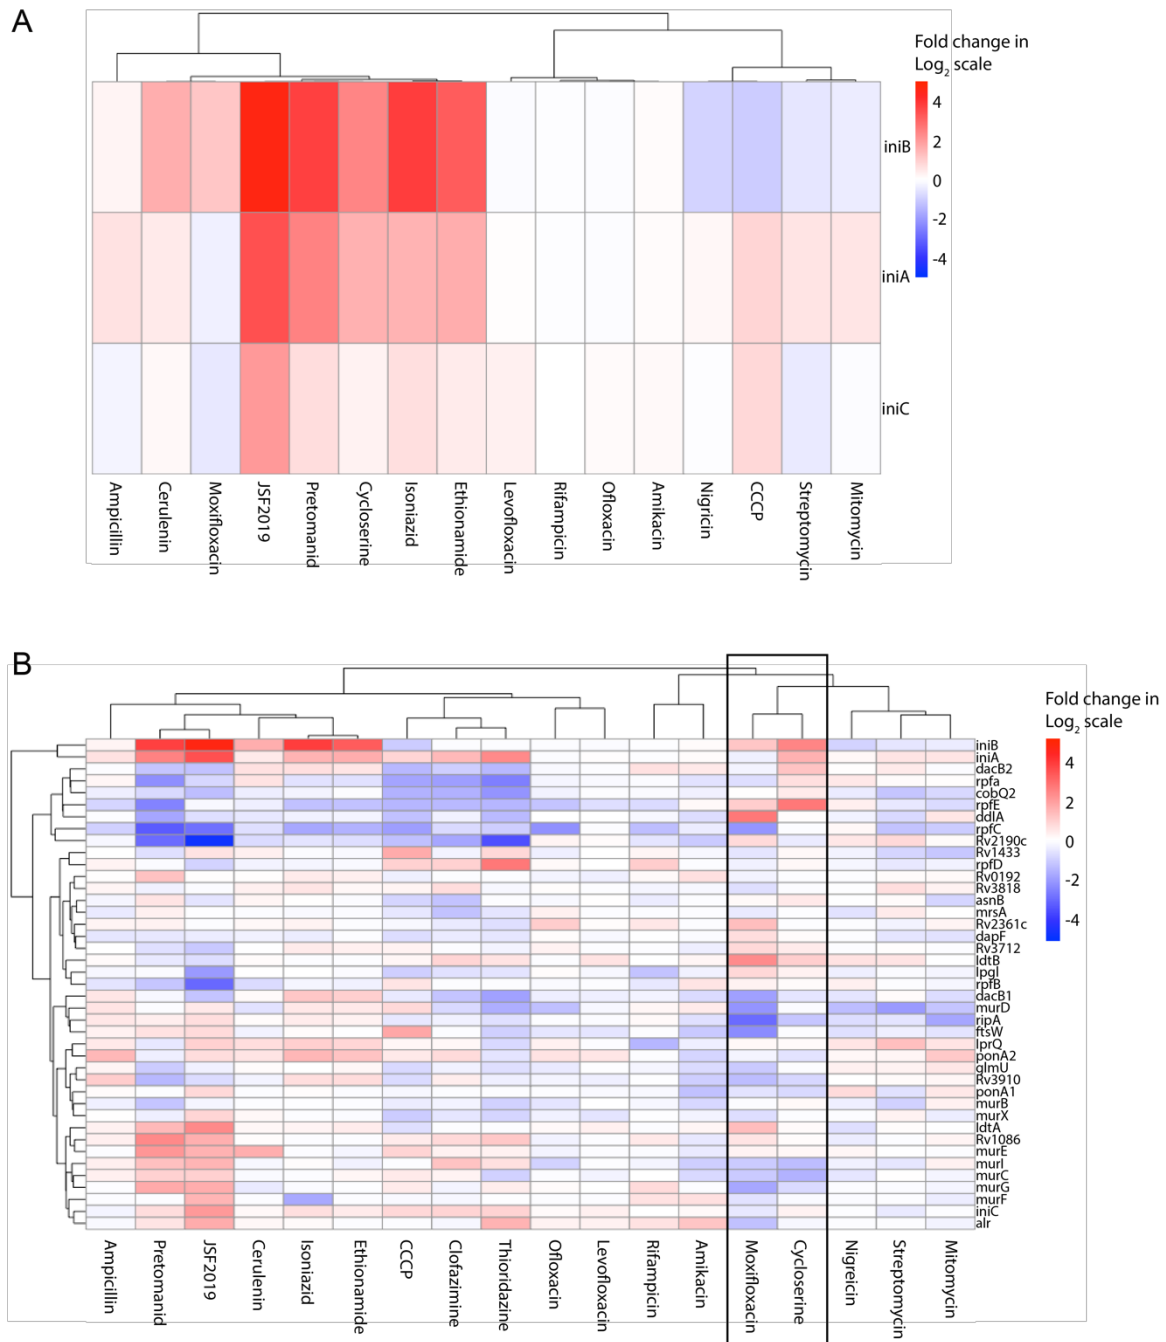

74

75 **Figure S6. Transcriptional response of Mtb to antibacterials in genes involved in cell wall**  
 76 **damage and biosynthesis. (A)** Expression profiles of the *iniBAC* operon in response to 16  
 77 antibacterials. Known inducers of the *iniBAC* operon isoniazid (INH), ethambutol (ETH), and  
 78 pretomanid are plotted as controls (B) Expression profiles of genes involved in peptidoglycan

79 biosynthesis in response to treatment with antibacterials. A box is drawn to highlight the profiles of  
80 cycloserine and moxifloxacin, which cluster together. Hierarchical clustering was performed using  
81 Pearson distance.

82

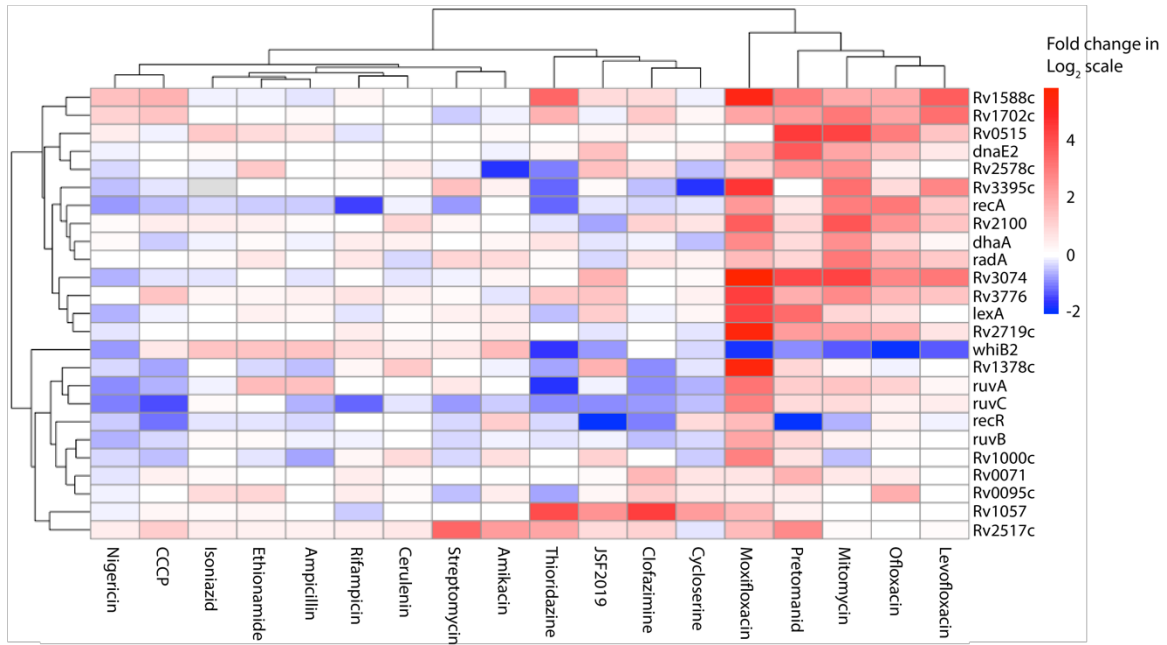

83

84 **Figure S7. Transcriptional response of Mtb to antibacterials in genes involved in DNA**  
 85 **damage.** Expression profiles of genes involved in the Mtb SOS response upon treatment with  
 86 antibacterials. Genes involved in the Mtb SOS response were defined as *recA-lexA* regulated  
 87 genes in Mtb (1-3). Hierarchical clustering was performed using Pearson distance.

88

89

90

91

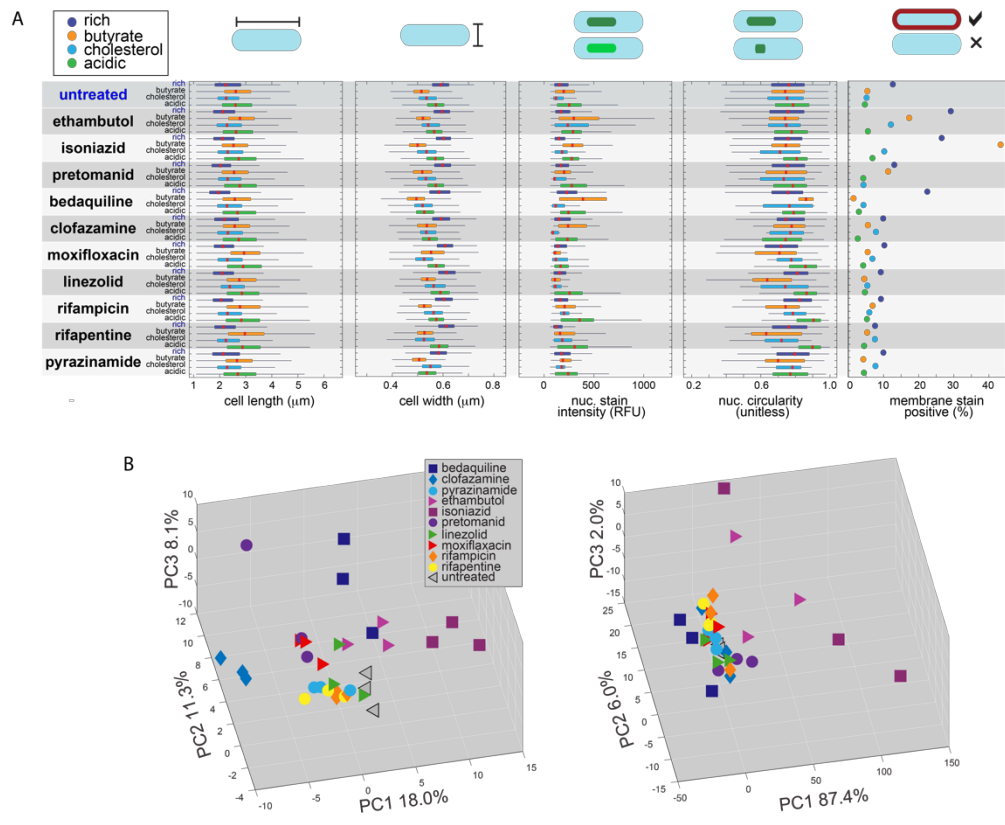

92

93

94 **Figure S8. Morphological features and response to drug treatment are dependent on growth**  
 95 **conditions.** (A) Mtb were treated with each antibiotic (or untreated control) following adaptation to  
 96 different growth media: rich (blue), butyrate as the sole carbon source (orange), cholesterol as the  
 97 sole carbon source (cyan), and low pH in rich medium (green) as described in Methods. Red lines  
 98 mark the medians, boxes mark the 25-75th percentiles, and the whiskers extend the full range,  
 99 excluding outliers (n=1029-6733). (B) PCA of morphological profiles in Mtb treated with antibiotics.  
 100 Mtb cells were grown in media containing carbohydrates (left) or butyrate (right) as the sole carbon  
 101 source. Bedaquiline (dark blue squares) clusters close to the cell wall acting antibiotics (pink and  
 102 purple shapes) in media containing carbohydrates (left) but not in butyrate (right).

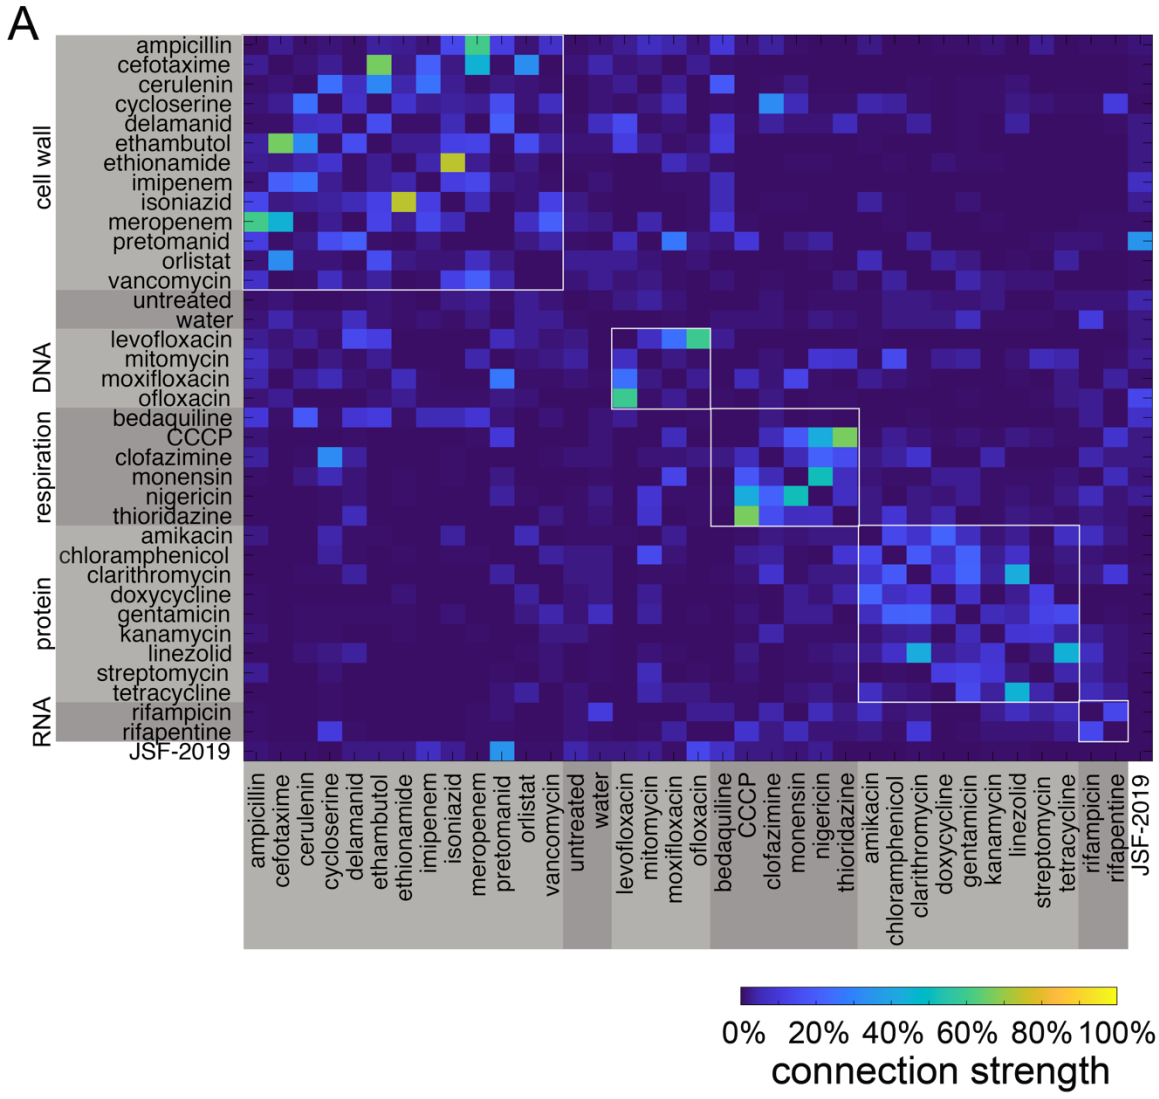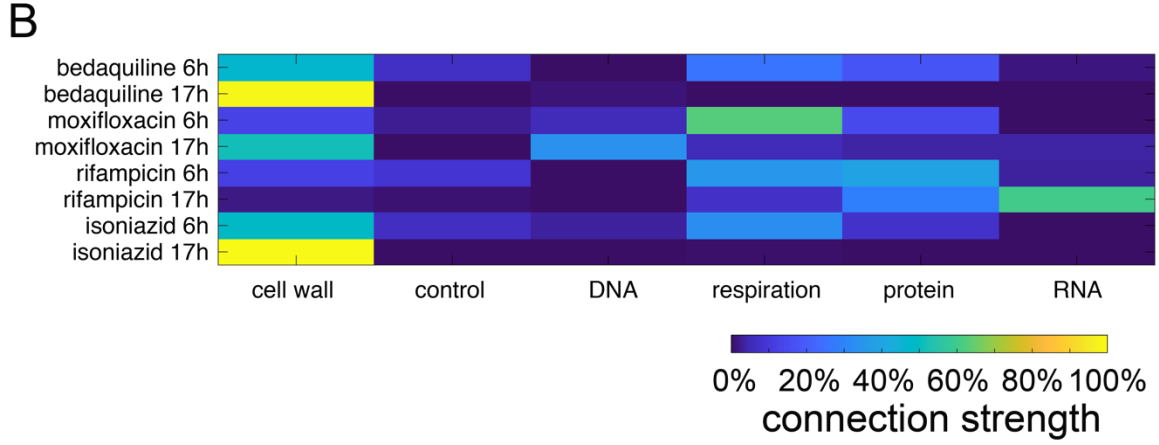

104 **Figure S9. Time and dose-dependency of profiles.** (A) Drug-drug matrix of the absolute  
105 difference in connection strengths as determined by MorphEUS analysis between low and high  
106 dose profiles with JSF-2019 applied. (B) Broad categorization of bedaquiline, moxifloxacin,  
107 rifampicin, and isoniazid at 6 hours mapped onto the joint dose profiles at ~1 doubling time (Fig.  
108 3). The 17-hour profiles are shown as a point of comparison.

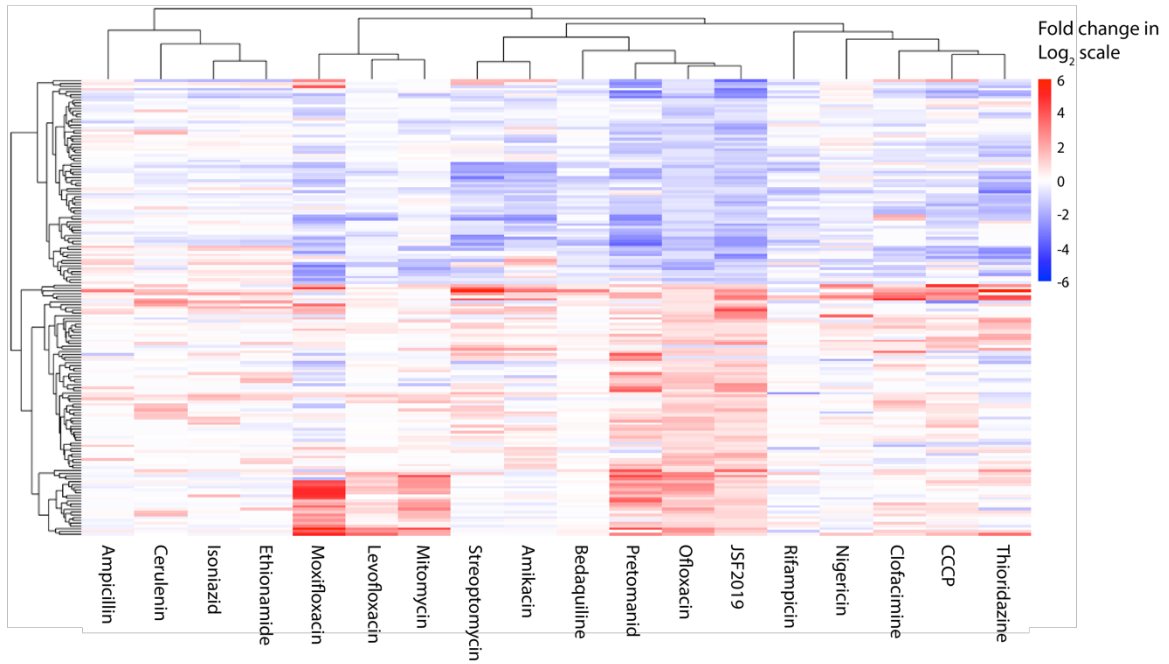

109

110

111 **Fig. S10. Transcriptional analysis of 165 genes co-regulated by JSF-2019 and ofloxacin.**

112 Hierarchical clustering by Pearson distance of the gene expression profiles for 165 genes that were

113 significantly co-regulated by JSF-2019 and ofloxacin by >1.5-fold.

114

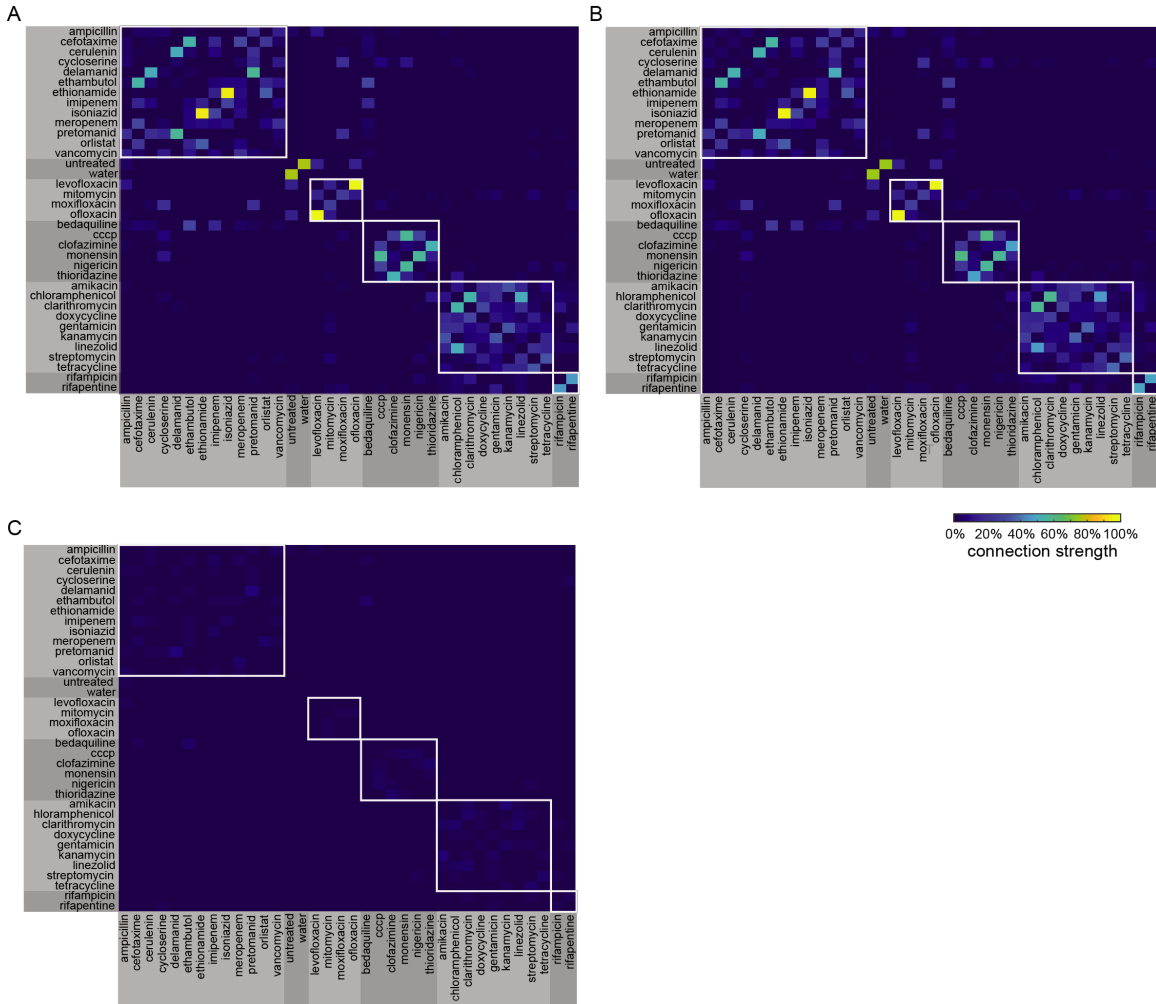

115

116 **Fig. S11. 70 classification trials are sufficient for cKNN convergence.** cKNN matrices with 70

117 (A, also shown in Fig. 3B) and 140 (B) classification trials. The magnitude of the difference in

118 connection strengths are shown in (C).

119



120 **Table S1. Compounds used in this study.** Primary drug targets, off-target effects, and broad  
 121 categorizations based on published studies. We determined IC90 values as the minimal  
 122 concentration of drug needed to inhibit at least 90% of growth. The broad categorization of each  
 123 drug was assigned based on literature review.

124

| Drug name                  | MIC90 (µg/ml) | Solvent | Vendor                  | Catalog number | Primary target                                                | Off target effects | Reference    |
|----------------------------|---------------|---------|-------------------------|----------------|---------------------------------------------------------------|--------------------|--------------|
| <b>CELL WALL SYNTHESIS</b> |               |         |                         |                |                                                               |                    |              |
| Meropenem                  | 25            | DMSO    | SigmaAldrich            | 13924<br>54    | Peptidoglycan (beta lactam)                                   | ATP burst          | (4, 5)       |
| Ampicillin                 | 25            | DMSO    | SigmaAldrich            | A9393          | Peptidoglycan (beta lactam)                                   |                    | (6)          |
| Cefotaxime                 | 25            | Water   | SigmaAldrich            | C7039          | Peptidoglycan (beta lactam)                                   |                    | (7)          |
| Isoniazid                  | 0.047         | DMSO    | SigmaAldrich            | I3377          | FASII/mycolic acid synthesis (InhA)                           | ATP burst          | (5, 8)       |
| Ethambutol                 | 1.5           | DMSO    | Alfa Aesar              | J6069<br>5     | Arabinogalactan (AftB,AftC,AftD, EmbC)                        | ATP burst          | (5, 8)       |
| Ethionamide                | 3.125         | DMSO    | TCI Chemicals           | E0695          | FASII/mycolic acid synthesis (InhA)                           |                    | (8)          |
| Imipenem                   | 3.125         | Water   | SigmaAldrich            | PHR1<br>796    | Peptidoglycan (beta lactam)                                   | ATP burst          | (7, 9)       |
| Vancomycin                 | 25            | Water   | SigmaAldrich            | V0045<br>000   | Peptidoglycan (d-ala-d crosslinking)                          |                    | (8)          |
| Cycloserine                | 6.25          | DMSO    | Calbiochem              | 23983<br>1     | Peptidoglycan (d-ala-d ligase)                                |                    | (8, 10)      |
| Delamanid                  | 1.5           | DMSO    | Advanced ChemBlocks Inc | L1348<br>5     | Respiratory toxicity/mycobacterial cell wall (Nitroimidazole) |                    | (11-13)      |
| Pretomanid                 | 12.5          | DMSO    | ApexBio Technology      | A1736          | Respiratory toxicity/mycobacterial cell wall (Nitroimidazole) | NO release         | (11, 13, 14) |

|                                           |             |         |                    |           |                                       |                 |              |
|-------------------------------------------|-------------|---------|--------------------|-----------|---------------------------------------|-----------------|--------------|
| Cerulenin                                 | 12.5        | DMSO    | SigmaAldrich       | C2389     | FASII (KasA, KasB)                    |                 | (8)          |
| Orlistat                                  | 50 $\mu$ M* | DMSO    | VWR                | 89149-186 | PDIM                                  |                 | (15)         |
| <b>DNA SYNTHESIS</b>                      |             |         |                    |           |                                       |                 |              |
| Levofloxacin                              | 3.125       | DMSO    | SigmaAldrich       | 28266     | DNA gyrase                            |                 | (16, 17)     |
| Moxifloxacin                              | 6.25        | DMSO    | Alfa Aesa          | J66626    | DNA gyrase                            |                 | (18)         |
| Mitomycin                                 | 12.5        | DMSO    | SigmaAldrich       | Y0000378  | Alkylation of DNA                     | Redox recycling | (19, 20)     |
| Ofloxacin                                 | 12.5        | 1N NaOH | SigmaAldrich       | O8757     | DNA gyrase                            |                 | (16, 17, 21) |
| <b>PROTEIN SYNTHESIS</b>                  |             |         |                    |           |                                       |                 |              |
| Kanamycin                                 | 12.5        | Water   | VWR                | 408       | Aminoglycoside; 30S ribosomal subunit |                 | (22, 23)     |
| Amikacin                                  | 6.25        | Water   | SigmaAldrich       | A3650     | Aminoglycoside; 30S ribosomal subunit |                 | (22, 23)     |
| Chloramphenicol                           | 25          | DMSO    | SigmaAldrich       | C0378     | 50S ribosomal subunit                 |                 | (24)         |
| Clarithromycin                            | 12.5        | DMSO    | SigmaAldrich       | A3487     | 50S ribosomal subunit                 |                 | (23)         |
| Doxycycline                               | 12.5        | DMSO    | SigmaAldrich       | D9891     | 30S ribosomal subunit                 |                 | (25, 26)     |
| Gentamycin                                | 12.5        | Water   | SigmaAldrich       | G1264     | Aminoglycoside; 30S ribosomal subunit |                 | (22, 27)     |
| Streptomycin                              | 3.125       | Water   | SigmaAldrich       | S6501     | Aminoglycoside; 30S ribosomal subunit |                 | (28, 29)     |
| Tetracycline                              | 50          | DMSO    | SigmaAldrich       | 87128     | 30S ribosomal subunit                 |                 | (25)         |
| Linezolid                                 | 3.125       | DMSO    | ApexBio Technology | A5181     | 50S ribosomal subunit                 |                 | (30)         |
| <b>RESPIRATION</b>                        |             |         |                    |           |                                       |                 |              |
| Carbonyl cyanide 3-chlorophenyl-hydrazone | 6.25        | DMSO    | SigmaAldrich       | C2759     | Proton motive force                   |                 | (31)         |
| Monensin                                  | 12.5        | MeOH    | SigmaAldrich       | M5273     | Proton motive force                   |                 | (32)         |
| Nigericin                                 | 6.25        | MeOH    | SigmaAldrich       | N7143     | Proton motive force                   |                 | (33)         |

|                          |              |      |                    |                |                                                                                    |  |                       |
|--------------------------|--------------|------|--------------------|----------------|------------------------------------------------------------------------------------|--|-----------------------|
| Thioridazine             | 25           | DMSO | Enzo Life Sciences | BML-NS835-0005 | Electron transport chain - NADH dehydrogenase (NDH-2)                              |  | (33-35)               |
| Pyrazinamide             | 50*          | DMSO | TCI Chemicals      | P0633          | Proton motive force, fatty acid synthesis, trans-translation, coenzyme A synthesis |  | (34, 36, 37)          |
| Clofazimine              | 6.25         | DMSO | SigmaAldrich       | C8895          | Electron transport chain - NDH-2                                                   |  | (34, 38)              |
| Bedaquiline              | 3.125        | DMSO | SigmaAldrich       | 10288-25MG     | ATP synthase                                                                       |  | <u>(5, 34, 39-41)</u> |
| <b>RNAP</b>              |              |      |                    |                |                                                                                    |  |                       |
| Rifapentine              | 0.09         | DMSO | ApexBio Technology | B2127          | RpoB                                                                               |  | (42)                  |
| Rifampicin               | 0.09         | DMSO | TCI Chemicals      | R0079          | RpoB                                                                               |  | <u>(43)</u>           |
| <b>Blinded Compounds</b> |              |      |                    |                |                                                                                    |  |                       |
| DG167                    | 0.39 $\mu$ M | DMSO | N/A                | N/A            | KasA                                                                               |  | (44)                  |
| JSF-3285                 | 0.2 $\mu$ M  | DMSO | N/A                | N/A            | KasA                                                                               |  | (45)                  |
| JSF-2019                 | 0.15 $\mu$ M | DMSO | N/A                | N/A            | InhA (FAS-II)                                                                      |  | (46)                  |

125

\*Drugs that did not reach IC90

126 **Table S2. Features included in analysis pipeline.** For each feature, with exception to  
 127 FEATURE\_1\_count and FEATURE\_2\_count (noted in green), the median, quartile 1 (25%),  
 128 quartile 3 (75%), and interquartile range were included as metrics, resulting in 94 total features.  
 129 Descriptions come from the ImageJ documentation (47).

130

| <b>Feature</b>             | <b>Description</b>                                                                                                                  | <b>Unit</b>                       |
|----------------------------|-------------------------------------------------------------------------------------------------------------------------------------|-----------------------------------|
| <b>FEATURE_1_count</b>     | number of times given cell fluoresced with SYTO 24 stain                                                                            | number of instances               |
| <b>FEATURE_2_count</b>     | number of FM4-64FX stain positive foci                                                                                              | number of instances               |
| <b>SHAPE_area</b>          | area of cell                                                                                                                        | $\mu\text{m}^2$                   |
| <b>SHAPE_aspectRatio</b>   | major axis/minor axis of cell                                                                                                       | unitless                          |
| <b>SHAPE_circularity</b>   | $4 \times [\text{area}] / [\text{perimeter}]^2$ of cell ranges from 0 (infinitely elongated polygon) to 1 (perfect circle)          | unitless                          |
| <b>SHAPE_length</b>        | length of cell                                                                                                                      | $\mu\text{m}$                     |
| <b>SHAPE_perimeter</b>     | perimeter of cell                                                                                                                   | $\mu\text{m}$                     |
| <b>SHAPE_solidity</b>      | $[\text{area}] / [\text{convex area}]$ of cell                                                                                      | unitless                          |
| <b>SHAPE_width</b>         | width of cell                                                                                                                       | $\mu\text{m}$                     |
| <b>f_INTENSITY</b>         | intensity of FM4-64FX stain                                                                                                         | relative fluorescence units (RFU) |
| <b>f_SHAPE_area</b>        | area of FM4-64FX foci                                                                                                               | $\mu\text{m}^2$                   |
| <b>f_SHAPE_aspectRatio</b> | major axis/minor axis of FM4-64FX foci                                                                                              | unitless                          |
| <b>f_SHAPE_circularity</b> | $4 \times [\text{area}] / [\text{perimeter}]^2$ of FM4-64FX foci ranges from 0 (infinitely elongated polygon) to 1 (perfect circle) | unitless                          |
| <b>f_SHAPE_length</b>      | length of FM4-64FX foci                                                                                                             | $\mu\text{m}$                     |
| <b>f_SHAPE_perimeter</b>   | perimeter of FM4-64FX foci                                                                                                          | $\mu\text{m}$                     |
| <b>f_SHAPE_solidity</b>    | $[\text{area}] / [\text{convex area}]$ of FM4-64FX foci                                                                             | unitless                          |

|                            |                                                                                                                        |                                   |
|----------------------------|------------------------------------------------------------------------------------------------------------------------|-----------------------------------|
| <b>f_SHAPE_width</b>       | width of FM4-64FX foci                                                                                                 | μm                                |
| <b>s_INTENSITY</b>         | Intensity of SYTO 24 stain                                                                                             | relative fluorescence units (RFU) |
| <b>s_SHAPE_area</b>        | area of SYTO 24 foci                                                                                                   | μm <sup>2</sup>                   |
| <b>s_SHAPE_aspectRatio</b> | major axis/minor axis of SYTO 24 foci                                                                                  | unitless                          |
| <b>s_SHAPE_circularity</b> | 4*[area][perimeter] <sup>2</sup> of SYTO 24 foci<br>Ranges from 0 (infinitely elongated polygon) to 1 (perfect circle) | unitless                          |
| <b>s_SHAPE_length</b>      | length of SYTO 24 foci                                                                                                 | μm                                |
| <b>s_SHAPE_perimeter</b>   | perimeter of SYTO 24 foci                                                                                              | μm                                |
| <b>s_SHAPE_solidity</b>    | [area][convex area] of SYTO 24 foci                                                                                    | unitless                          |
| <b>s_SHAPE_width</b>       | width of SYTO 24 foci                                                                                                  | μm                                |

131

132

133

134

135

136

137

138

139

140

141 **Movie S1. Time-lapse imaging of *M. smegmatis* before, during, and after treatment with**  
142 **ethambutol.** RpoB-EGFP reporter *M. smegmatis* was imaged in nutrient-rich growth conditions in  
143 a constant-flow microfluidic device for 10 hours with no antibiotics, followed by a 6-hour drug  
144 treatment with 9.375 $\mu$ g/ml of ethambutol, and followed by a 10-hour no drug recovery period.

145 **Movie S2. Time-lapse imaging of *M. smegmatis* before, during, and after treatment with**  
146 **rifampicin.** RpoB-EGFP reporter *M. smegmatis* was imaged in nutrient-rich growth conditions in a  
147 constant-flow microfluidic device for 10 hours with no antibiotics, following by a 6-hour drug  
148 treatment with 75 $\mu$ g/ml of rifampicin, and followed by a 10-hour no drug recovery period.

149 **Movie S3. Time-lapse imaging of *M. smegmatis* before, during, and after treatment with**  
150 **moxifloxacin.** RpoB-EGFP reporter *M. smegmatis* was imaged in nutrient-rich growth conditions  
151 in a constant-flow microfluidic device for 10 hours with no antibiotics, following by a 6-hour drug  
152 treatment with 0.781 $\mu$ g/ml of moxifloxacin, and followed by a 10-hour no drug recovery period.

153 **Dataset S1 : Matrix of drug-drug connection strengths.** MorphEUS output for the joint dose  
154 (sheet 1), low dose (sheet 2), and high dose drug profiles (sheet 3). Numerical values here  
155 correspond with the heatmap representations in Figure 3B and Figure S5B, respectively.

156 **Dataset S2: List of co-regulated genes between JSF-2019 and ofloxacin.** Table of genes used  
157 for hierarchical clustering in Figure S10. Functional annotation of each gene product was  
158 designated using tuberculist (<http://tuberculist.epfl.ch>).

159  
160  
161  
162  
163  
164  
165  
166  
167  
168  
169  
170

171 **References**

- 172 1. A. U. Muller, F. Imkamp, E. Weber-Ban, The Mycobacterial LexA/RecA-Independent DNA  
173 Damage Response Is Controlled by PafBC and the Pup-Proteasome System. *Cell Rep* **23**,  
174 3551-3564 (2018).
- 175 2. E. O. Davis, E. M. Dullaghan, L. Rand, Definition of the mycobacterial SOS box and use to  
176 identify LexA-regulated genes in *Mycobacterium tuberculosis*. *J Bacteriol* **184**, 3287-3295  
177 (2002).
- 178 3. K. L. Smollett *et al.*, Global analysis of the regulon of the transcriptional repressor LexA, a  
179 key component of SOS response in *Mycobacterium tuberculosis*. *J Biol Chem* **287**, 22004-  
180 22014 (2012).
- 181 4. P. Kumar *et al.*, Meropenem inhibits D,D-carboxypeptidase activity in *Mycobacterium*  
182 *tuberculosis*. *Mol Microbiol* **86**, 367-381 (2012).
- 183 5. A. Shetty, T. Dick, Mycobacterial Cell Wall Synthesis Inhibitors Cause Lethal ATP Burst.  
184 *Front Microbiol* **9**, 1898 (2018).
- 185 6. H. F. Chambers *et al.*, Can penicillins and other beta-lactam antibiotics be used to treat  
186 tuberculosis? *Antimicrob Agents Chemother* **39**, 2620-2624 (1995).
- 187 7. V. Dubee *et al.*, Inactivation of *Mycobacterium tuberculosis* l,d-transpeptidase LdtMt(1) by  
188 carbapenems and cephalosporins. *Antimicrob Agents Chemother* **56**, 4189-4195 (2012).
- 189 8. K. A. Abrahams, G. S. Besra, Mycobacterial cell wall biosynthesis: a multifaceted antibiotic  
190 target. *Parasitology* **145**, 116-133 (2018).
- 191 9. M. Lindman, T. Dick, Bedaquiline Eliminates Bactericidal Activity of beta-Lactams against  
192 *Mycobacterium abscessus*. *Antimicrob Agents Chemother* **63** (2019).
- 193 10. J. B. Bruning, A. C. Murillo, O. Chacon, R. G. Barletta, J. C. Sacchetti, Structure of the  
194 *Mycobacterium tuberculosis* D-alanine:D-alanine ligase, a target of the antituberculosis  
195 drug D-cycloserine. *Antimicrob Agents Chemother* **55**, 291-301 (2011).
- 196 11. S. Wellington, D. T. Hung, The Expanding Diversity of *Mycobacterium tuberculosis* Drug  
197 Targets. *ACS Infect Dis* **4**, 696-714 (2018).

- 198 12. M. Matsumoto *et al.*, OPC-67683, a nitro-dihydro-imidazooxazole derivative with promising  
199 action against tuberculosis in vitro and in mice. *PLoS Med* **3**, e466 (2006).
- 200 13. U. Manjunatha, H. I. Boshoff, C. E. Barry, The mechanism of action of PA-824: Novel  
201 insights from transcriptional profiling. *Commun Integr Biol* **2**, 215-218 (2009).
- 202 14. C. K. Stover *et al.*, A small-molecule nitroimidazopyran drug candidate for the treatment of  
203 tuberculosis. *Nature* **405**, 962-966 (2000).
- 204 15. C. Rens *et al.*, Effects of Lipid-Lowering Drugs on Vancomycin Susceptibility of  
205 Mycobacteria. *Antimicrob Agents Chemother* **60**, 6193-6199 (2016).
- 206 16. S. Akcali, S. Surucuoglu, C. Cicek, B. Ozbakkaloglu, In vitro activity of ciprofloxacin,  
207 ofloxacin and levofloxacin against Mycobacterium tuberculosis. *Ann Saudi Med* **25**, 409-  
208 412 (2005).
- 209 17. N. Rastogi, K. S. Goh, A. Bryskier, A. Devallois, In vitro activities of levofloxacin used alone  
210 and in combination with first- and second-line antituberculous drugs against  
211 Mycobacterium tuberculosis. *Antimicrob Agents Chemother* **40**, 1610-1616 (1996).
- 212 18. K. J. Aldred, T. R. Blower, R. J. Kerns, J. M. Berger, N. Osheroff, Fluoroquinolone  
213 interactions with Mycobacterium tuberculosis gyrase: Enhancing drug activity against wild-  
214 type and resistant gyrase. *Proc Natl Acad Sci U S A* **113**, E839-846 (2016).
- 215 19. Y. Wang *et al.*, Distinct roles of cytochrome P450 reductase in mitomycin C redox cycling  
216 and cytotoxicity. *Mol Cancer Ther* **9**, 1852-1863 (2010).
- 217 20. K. Lin *et al.*, Mycobacterium tuberculosis Thioredoxin Reductase Is Essential for Thiol  
218 Redox Homeostasis but Plays a Minor Role in Antioxidant Defense. *PLoS Pathog* **12**,  
219 e1005675 (2016).
- 220 21. M. Imamura, S. Shibamura, I. Hayakawa, Y. Osada, Inhibition of DNA gyrase by optically  
221 active ofloxacin. *Antimicrob Agents Chemother* **31**, 325-327 (1987).



- 222 22. L. P. Kotra, J. Haddad, S. Mobashery, Aminoglycosides: perspectives on mechanisms of  
223 action and resistance and strategies to counter resistance. *Antimicrob Agents Chemother*  
224 **44**, 3249-3256 (2000).
- 225 23. W. W. Barrow, Treatment of mycobacterial infections. *Rev Sci Tech* **20**, 55-70 (2001).
- 226 24. J. M. Schifano *et al.*, Mycobacterial toxin MazF-mt6 inhibits translation through cleavage  
227 of 23S rRNA at the ribosomal A site. *Proc Natl Acad Sci U S A* **110**, 8501-8506 (2013).
- 228 25. I. Chopra, M. Roberts, Tetracycline antibiotics: mode of action, applications, molecular  
229 biology, and epidemiology of bacterial resistance. *Microbiol Mol Biol Rev* **65**, 232-260 ;  
230 second page, table of contents (2001).
- 231 26. N. Alsaad *et al.*, Potential antimicrobial agents for the treatment of multidrug-resistant  
232 tuberculosis. *Eur Respir J* **43**, 884-897 (2014).
- 233 27. F. Sanz-Garcia *et al.*, Mycobacterial Aminoglycoside Acetyltransferases: A Little of Drug  
234 Resistance, and a Lot of Other Roles. *Front Microbiol* **10**, 46 (2019).
- 235 28. R. Chulluncuy, C. Espiche, J. A. Nakamoto, A. Fabbretti, P. Milon, Conformational  
236 Response of 30S-bound IF3 to A-Site Binders Streptomycin and Kanamycin. *Antibiotics*  
237 (*Basel*) **5** (2016).
- 238 29. M. S. Shaila, K. P. Gopinathan, T. Ramakrishnan, Protein synthesis in Mycobacterium  
239 tuberculosis H37Rv and the effect of streptomycin in streptomycin-susceptible and -  
240 resistant strains. *Antimicrob Agents Chemother* **4**, 205-213 (1973).
- 241 30. D. M. Livermore, Linezolid in vitro: mechanism and antibacterial spectrum. *J Antimicrob*  
242 *Chemother* **51 Suppl 2**, ii9-16 (2003).
- 243 31. C. M. Pule *et al.*, Efflux pump inhibitors: targeting mycobacterial efflux systems to enhance  
244 TB therapy. *J Antimicrob Chemother* **71**, 17-26 (2016).
- 245 32. A. Huczynski, J. Janczak, D. Lowicki, B. Brzezinski, Monensin A acid complexes as a  
246 model of electrogenic transport of sodium cation. *Biochim Biophys Acta* **1818**, 2108-2119  
247 (2012).

- 248 33. P. A. Black *et al.*, Energy metabolism and drug efflux in *Mycobacterium tuberculosis*.  
249 *Antimicrob Agents Chemother* **58**, 2491-2503 (2014).
- 250 34. D. Bald, C. Villellas, P. Lu, A. Koul, Targeting Energy Metabolism in *Mycobacterium*  
251 *tuberculosis*, a New Paradigm in Antimycobacterial Drug Discovery. *MBio* **8** (2017).
- 252 35. H. I. Boshoff *et al.*, The transcriptional responses of *Mycobacterium tuberculosis* to  
253 inhibitors of metabolism: novel insights into drug mechanisms of action. *J Biol Chem* **279**,  
254 40174-40184 (2004).
- 255 36. E. A. Lamont, N. A. Dillon, A. D. Baughn, The Bewildering Antitubercular Action of  
256 Pyrazinamide. *Microbiol Mol Biol Rev* **84** (2020).
- 257 37. Y. Zhang, M. M. Wade, A. Scorpio, H. Zhang, Z. Sun, Mode of action of pyrazinamide:  
258 disruption of *Mycobacterium tuberculosis* membrane transport and energetics by  
259 pyrazinoic acid. *J Antimicrob Chemother* **52**, 790-795 (2003).
- 260 38. T. Yano *et al.*, Reduction of clofazimine by mycobacterial type 2 NADH:quinone  
261 oxidoreductase: a pathway for the generation of bactericidal levels of reactive oxygen  
262 species. *J Biol Chem* **286**, 10276-10287 (2011).
- 263 39. G. G. Jickly Palmae Sarathy, Thomas Dick, Re-Understanding the Mechanisms of Action  
264 of the Anti-Mycobacterial Drug Bedaquiline. *Antibiotics* **8** (2019).
- 265 40. A. Koul *et al.*, Delayed bactericidal response of *Mycobacterium tuberculosis* to bedaquiline  
266 involves remodelling of bacterial metabolism. *Nat Commun* **5**, 3369 (2014).
- 267 41. B. S. Lee *et al.*, Inhibitors of energy metabolism interfere with antibiotic-induced death in  
268 mycobacteria. *J Biol Chem* **294**, 1936-1943 (2019).
- 269 42. S. S. Munsiff, C. Kambili, S. D. Ahuja, Rifapentine for the treatment of pulmonary  
270 tuberculosis. *Clin Infect Dis* **43**, 1468-1475 (2006).
- 271 43. K. Richardson *et al.*, Temporal and intrinsic factors of rifampicin tolerance in mycobacteria.  
272 *Proc Natl Acad Sci U S A* **113**, 8302-8307 (2016).

- 273 44. P. Kumar *et al.*, Synergistic Lethality of a Binary Inhibitor of Mycobacterium tuberculosis  
274 KasA. *MBio* **9** (2018).
- 275 45. D. Inoyama *et al.*, A Preclinical Candidate Targeting Mycobacterium tuberculosis KasA.  
276 *Cell Chem Biol* 10.1016/j.chembiol.2020.02.007 (2020).
- 277 46. X. Wang *et al.*, Antitubercular Triazines: Optimization and Intrabacterial Metabolism. *Cell*  
278 *Chem Biol* 10.1016/j.chembiol.2019.10.010 (2019).
- 279 47. T. Peng *et al.*, A BaSiC tool for background and shading correction of optical microscopy  
280 images. *Nat Commun* **8**, 14836 (2017).
- 281
- 282
